# Supplementary material for: Pan-cancer analysis reveals NUP37 as a prognostic biomarker correlated with the immunosuppressive microenvironment in glioma
Source: Aging (Albany NY). 2022 Jan 30;14(2):1033–47. doi: 10.18632/aging.203862 (PMC8833130; doi:10.18632/aging.203862)
Supplement: Supplementary Table 1 [file aging-14-203862-s001.xlsx]

## Sheet: aging-22-013554-s001
Supplementary Table 1. The correlation between NUP37 and IC50 of 192 anti-cancer drugs.
correlation,pvalue,type,label
-0.26910299,0.080988687,BI-2536,non-significant
-0.16254541,6.14E-06,MK-1775,negtive
-0.161577134,8.84E-06,Erlotinib,negtive
-0.151335495,2.90E-05,AZD3759,negtive
-0.129801636,0.000355529,Tamoxifen,negtive
-0.126430528,0.000488808,Dasatinib,negtive
-0.125110907,0.000389521,Sapitinib,negtive
-0.122425909,0.000684801,Palbociclib,negtive
-0.120495661,0.001014428,VE821,negtive
-0.119754611,0.001024254,Gefitinib,negtive
-0.119571999,0.001286857,Ibrutinib,negtive
-0.116243127,0.001459842,Temozolomide,negtive
-0.111316066,0.002393076,GSK591,negtive
-0.110324829,0.002531979,Pevonedistat,negtive
-0.110064917,0.001846926,GSK1904529A,negtive
-0.106208433,0.004171451,ML323,negtive
-0.105653021,0.004374255,VE-822,negtive
-0.104481237,0.004254435,Vinblastine,negtive
-0.104314816,0.004264468,AGI-5198,negtive
-0.104047338,0.0042355,Lapatinib,negtive
-0.103981339,0.003216335,Afatinib,negtive
-0.103501725,0.004575275,YK-4-279,negtive
-0.099728336,0.006198553,Wee1 Inhibitor,negtive
-0.0997159,0.006344328,WIKI4,negtive
-0.096787662,0.007866068,Gemcitabine,negtive
-0.096310662,0.008350769,MIM1,negtive
-0.095949381,0.008598742,GDC0810,negtive
-0.091703433,0.013441767,Acetalax,negtive
-0.091588139,0.009454948,5-Fluorouracil,negtive
-0.090567552,0.014642574,Topotecan,negtive
-0.089109419,0.016321733,KRAS (G12C) Inhibitor-12,negtive
-0.088616288,0.016926643,IRAK4_4710,negtive
-0.086147934,0.017980641,Paclitaxel,negtive
-0.085467791,0.019556978,Vinorelbine,negtive
-0.084760201,0.020340471,BPD-00008900,negtive
-0.083363419,0.022601041,Savolitinib,negtive
-0.082527797,0.02617379,Teniposide,negtive
-0.081480706,0.025751606,AZD6738,negtive
-0.080450529,0.030199098,Obatoclax Mesylate,negtive
-0.079703829,0.120886468,Daporinad,non-significant
-0.079331773,0.029935904,BDP-00009066,negtive
-0.078945861,0.030746077,Sepantronium bromide,negtive
-0.07890502,0.034271185,Vincristine,negtive
-0.078793258,0.031071593,Buparlisib,negtive
-0.07661255,0.035561117,Dabrafenib,negtive
-0.076175122,0.037133107,Cytarabine,negtive
-0.075949292,0.031295555,Camptothecin,negtive
-0.075907856,0.03780493,Dactolisib,negtive
-0.075816817,0.041125977,Wnt-C59,negtive
-0.075225833,0.038138971,AZD7762,negtive
-0.074940035,0.041273591,Rapamycin,negtive
-0.07448077,0.04156932,UMI-77,negtive
-0.074100222,0.046096415,Dinaciclib,negtive
-0.072235266,0.005706433,Dactinomycin,negtive
-0.072055695,0.041599454,LGK974,negtive
-0.0710211,0.055781551,Podophyllotoxin bromide,non-significant
-0.070006246,0.056474012,VX-11e,non-significant
-0.069516575,0.057217762,Osimertinib,non-significant
-0.068983991,0.064496353,GSK2606414,non-significant
-0.068476231,0.065363932,I-BET-762,non-significant
-0.066584866,0.067829703,Bortezomib,non-significant
-0.065118448,0.079530863,Entospletinib,non-significant
-0.064280029,0.012922633,Ulixertinib,negtive
-0.063790133,0.08003309,Sorafenib,non-significant
-0.062749075,0.082040311,MG-132,non-significant
-0.062573293,0.092037775,AZD5438,non-significant
-0.061858578,0.090697462,P22077,non-significant
-0.061745738,0.019537019,Docetaxel,negtive
-0.06132424,0.093744972,Cyclophosphamide,non-significant
-0.060621885,0.563776788,SB216763,non-significant
-0.060467581,0.10353669,Leflunomide,non-significant
-0.058835986,0.096109637,Luminespib,non-significant
-0.05806438,0.110902014,Vorinostat,non-significant
-0.057519673,0.12151545,Mitoxantrone,non-significant
-0.056834281,0.126287938,AZD5153,non-significant
-0.056524817,0.128104603,AGI-6780,non-significant
-0.056314596,0.0279224,Oxaliplatin,negtive
-0.056211503,0.130236176,LY2109761,non-significant
-0.056151651,0.12621169,LJI308,non-significant
-0.055237534,0.13730972,CDK9_5576,non-significant
-0.05490138,0.133315128,Epirubicin,non-significant
-0.054066401,0.143094438,GNE-317,non-significant
-0.05336074,0.039646509,Fulvestrant,negtive
-0.051480891,0.159278497,WEHI-539,non-significant
-0.05128479,0.168653424,Eg5_9814,non-significant
-0.050926316,0.170763134,PAK_5339,non-significant
-0.050535424,0.173776482,VSP34_8731,non-significant
-0.048568275,0.191465767,Nelarabine,non-significant
-0.048228446,0.194286604,Picolinici-acid,non-significant
-0.047951947,0.196859087,Carmustine,non-significant
-0.047291669,0.20310268,Ruxolitinib,non-significant
-0.046779996,0.196196977,Cisplatin,non-significant
-0.046739494,0.18717239,EPZ5676,non-significant
-0.046493164,0.204038608,MIRA-1,non-significant
-0.046176494,0.207750281,MK-8776,non-significant
-0.045974466,0.215985543,PFI3,non-significant
-0.045052145,0.225349205,Fludarabine,non-significant
-0.044604416,0.208147118,Irinotecan,non-significant
-0.042715595,0.250355228,OF-1,non-significant
-0.042362681,0.247514566,Pyridostatin,non-significant
-0.041581846,0.255706689,I-BRD9,non-significant
-0.040556039,0.275130482,BMS-345541,non-significant
-0.039949738,0.259052684,SCH772984,non-significant
-0.039747902,0.282499318,Crizotinib,non-significant
-0.039728857,0.275917005,Nilotinib,non-significant
-0.03869066,0.298168097,GSK343,non-significant
-0.03757304,0.312018791,OTX015,non-significant
-0.035860149,0.327040808,GSK2578215A,non-significant
-0.035286633,0.343402585,IAP_5620,non-significant
-0.035215681,0.34370565,LCL161,non-significant
-0.035152636,0.814536782,JQ1,non-significant
-0.032937653,0.36899296,BIBR-1532,non-significant
-0.032506914,0.38146238,Alisertib,non-significant
-0.029456516,0.42807378,ERK_6604,non-significant
-0.028386202,0.445369877,RVX-208,non-significant
-0.028149877,0.436281967,Trametinib,non-significant
-0.027243837,0.46359524,MN-64,non-significant
-0.027173913,0.856122789,AZD6482,non-significant
-0.026917557,0.470199831,AZD5991,non-significant
-0.026830959,0.470707148,CDK9_5038,non-significant
-0.026774676,0.451207524,PLX-4720,non-significant
-0.02647028,0.455235724,EPZ004777,non-significant
-0.026281345,0.479543707,AZD2014,non-significant
-0.025639414,0.482358758,Venetoclax,non-significant
-0.025369527,0.488145312,AZD5363,non-significant
-0.024332369,0.512733069,PRT062607,non-significant
-0.023527102,0.506104928,PD0325901,non-significant
-0.02344068,0.521822943,Ipatasertib,non-significant
-0.023435838,0.523026247,Talazoparib,non-significant
-0.02340732,0.528893892,Gallibiscoquinazole,non-significant
-0.022685991,0.535590587,Afuresertib,non-significant
-0.022581608,0.523352155,Alpelisib,non-significant
-0.02245837,0.54629259,Dihydrorotenone,non-significant
-0.022274168,0.549036866,Zoledronate,non-significant
-0.02112841,0.565019842,AMG-319,non-significant
-0.020880887,0.574310574,JAK1_8709,non-significant
-0.019931816,0.59183524,XAV939,non-significant
-0.019699503,0.596161958,Sinularin,non-significant
-0.019258642,0.586265135,Taselisib,non-significant
-0.018670948,0.610408018,Navitoclax,non-significant
-0.016001542,0.66194846,Cediranib,non-significant
-0.015928873,0.668300709,CZC24832,non-significant
-0.014113949,0.699761298,BMS-536924,non-significant
-0.013620766,0.714075724,Mirin,non-significant
-0.012659531,0.726993219,Pictilisib,non-significant
-0.011069182,0.765895866,Elephantin,non-significant
-0.010803689,0.943846693,SB505124,non-significant
-0.009434966,0.794185972,MK-2206,non-significant
-0.008078939,0.957503322,Ribociclib,non-significant
-0.007296828,0.841349725,PD173074,non-significant
-0.006937121,0.852179285,Sabutoclax,non-significant
-0.005777943,0.874561469,Telomerase Inhibitor IX,non-significant
-0.005111308,0.890722847,IWP-2,non-significant
-0.004159046,0.909950838,AT13148,non-significant
-0.003732629,0.918823752,ABT737,non-significant
-0.002763806,0.940820954,ULK1_4989,non-significant
-0.002685624,0.942891307,AZD5582,non-significant
-0.001618871,0.99138336,NU7441,non-significant
-0.001056682,0.977325112,PRIMA-1MET,non-significant
-0.000854181,0.981268713,Olaparib,non-significant
0.00083869,0.982039358,AZ960,non-significant
0.002264811,0.950002972,Staurosporine,non-significant
0.00234907,0.949031302,AZ6102,non-significant
0.002405905,0.948437317,TAF1_5496,non-significant
0.005284303,0.839363278,Uprosertib,non-significant
0.008649717,0.816022263,WZ4003,non-significant
0.009395733,0.800475606,PCI-34051,non-significant
0.009688237,0.794540016,AZD1208,non-significant
0.010180868,0.77371755,Linsitinib,non-significant
0.013111682,0.723224919,Entinostat,non-significant
0.015082595,0.679449027,AZD4547,non-significant
0.016540137,0.656372981,Selumetinib,non-significant
0.017395787,0.639822807,AZD1332,non-significant
0.025156009,0.491814848,NVP-ADW742,non-significant
0.028335375,0.445870944,JAK_8517,non-significant
0.036339348,0.328184508,ERK_2440,non-significant
0.037920765,0.299992338,AZD8186,non-significant
0.038707572,0.297622677,Niraparib,non-significant
0.045737782,0.211799287,Foretinib,non-significant
0.046461138,0.753842629,Tozasertib,non-significant
0.047835039,0.64887458,AZD8055,non-significant
0.056800564,0.71419975,BMS-754807,non-significant
0.058697839,0.114308015,IGF1R_3801,non-significant
0.065751477,0.068401808,Nutlin-3a (-),non-significant
0.087290332,0.15887889,OSI-027,non-significant
0.132901634,0.378593315,Doramapimod,non-significant
0.137755102,0.350458919,RO-3306,non-significant
0.155775076,0.290391249,KU-55933,non-significant
0.176919519,0.234183667,ZM447439,non-significant
0.206734694,0.154089679,Axitinib,non-significant
0.343030829,0.016992868,PF-4708671,positive
0.365935736,0.010532282,GSK269962A,positive
